# Supplementary material for: Fabrication of ultra-high energy and power asymmetric supercapacitors based on hybrid 2D MoS2/graphene oxide composite electrodes: a binder-free approach
Source: Royal Society of Chemistry journal article supplement (doi:10.1039/c6ra00670a), 2016-01-01
Supplement: c6ra00670a1.pdf [file c6ra00670a1.pdf]

## Supporting information

# Fabrication of ultra-high energy and power asymmetric supercapacitors based on hybrid 2D MoS<sub>2</sub>/Graphene oxide composite electrodes: A binder free approach

Umakant M. Patil<sup>‡ a</sup>, Min Sik Nam<sup>‡ a</sup>, Seokwon Kang<sup>b</sup>, Ji Soo Sohn<sup>a</sup>, Heung Bo Sim<sup>a</sup>,  
Shinil Kang<sup>a</sup>, Seong Chan Jun<sup>\*a</sup>

<sup>a</sup>Department of Mechanical Engineering, Yonsei University, Seoul 120-749, Korea.

<sup>b</sup>Korea Railroad Research Institute, 176 Cheoldo Bangmulgwan-ro, Uiwang, Gyeonggido, Korea.

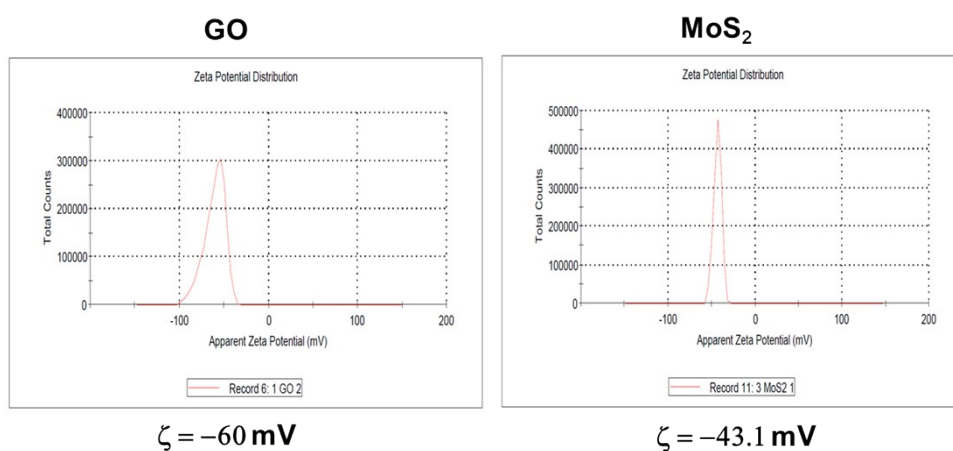

**Figure S1** Zeta potential measurement of colloidal suspension of 2D MoS<sub>2</sub> and GNS nanosheets in ACN solution (1 mg ml<sup>-1</sup>).

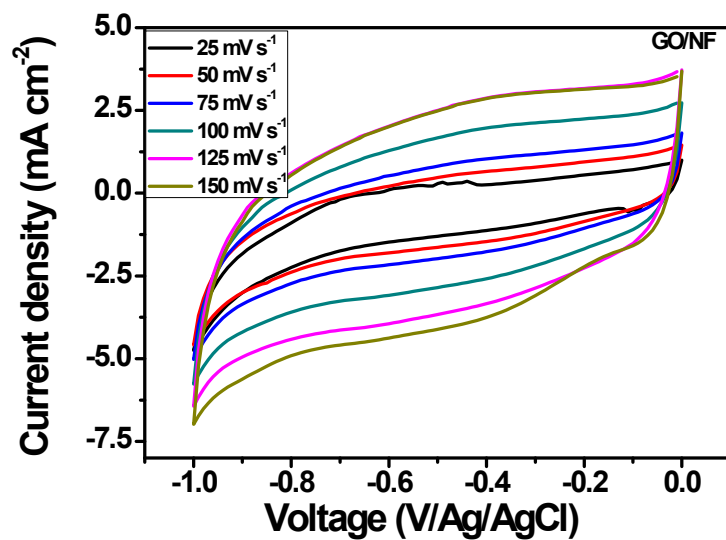

**Figure S2** Scan rate dependent (25-150 mV s<sup>-1</sup>) CV curves of GO coated Ni foam electrode within optimized potential window of 0.0 to -1.0 V in aqueous 1 M Na<sub>2</sub>SO<sub>4</sub>.

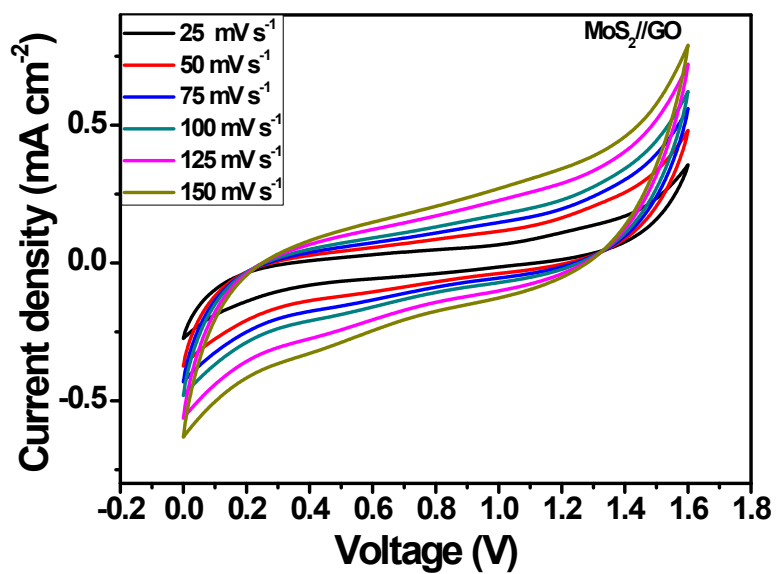

**Figure S3** Scan rate dependent (25-150 mV s<sup>-1</sup>) CV curves of MoS<sub>2</sub>//GO asymmetric supercapacitor device within optimized potential window of 0 to 1.6 V in aqueous 1 M Na<sub>2</sub>SO<sub>4</sub>.

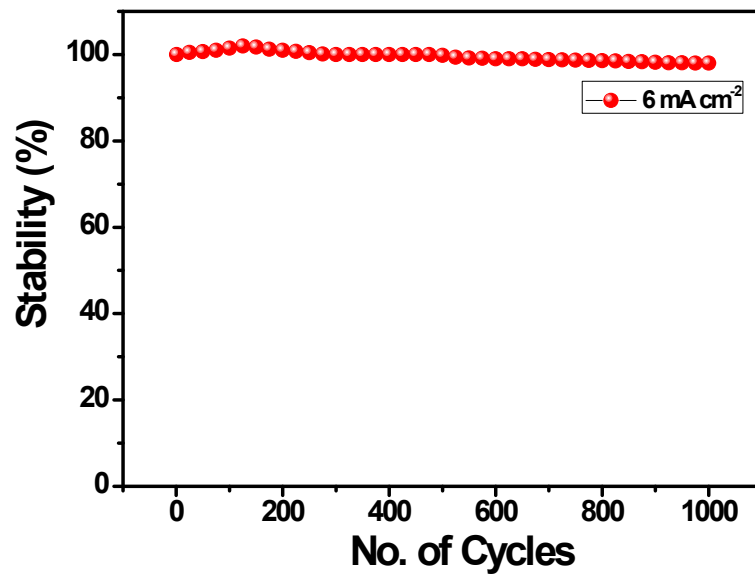

**Figure S4** Stability graph of MoS<sub>2</sub>/GO//GO asymmetric supercapacitor device over 1000 cycles at 6 mA cm<sup>-2</sup> charging-discharging current density.
